# Supplementary material for: Identification of OAT1/OAT3 as Contributors to Cisplatin Toxicity
Source: PubMed Central journal article supplement — Clin Transl Sci. 2017 Jul 8;10(5):412–20. doi: 10.1111/cts.12480 (PMC5593168; doi:10.1111/cts.12480), 2017-07-08
Supplement: CTS-10-412-s001.pdf [file CTS-10-412-s001.pdf]

**Supplementary Table S1.** Serum chemistry at baseline in wild-type, Oat1(-/-), and Oat3(-/-) mice.

| Parameter                  | Wild-type     | Oat1(-/-)     | Oat3(-/-)     |
|----------------------------|---------------|---------------|---------------|
| Albumin (g/dL)             | 3.1 ± 0.200   | 3.15 ± 0.122  | 2.90 ± 0.100  |
| Alkaline phosphatase (U/L) | 168 ± 41.7    | 181 ± 16.3    | 121 ± 25.1    |
| ALT (U/L)                  | 29.2 ± 3.39   | 56.6 ± 20.2   | 22.6 ± 5.77   |
| Amylase (U/L)              | 2230 ± 240    | 2860 ± 387    | 2130 ± 202    |
| BUN (mg/dL)                | 23.0 ± 2.40   | 21.5 ± 1.59   | 18.6 ± 0.794  |
| Calcium (mg/dL)            | 7.80 ± 0.346  | 7.95 ± 0.122  | 7.20 ± 0.173  |
| Creatinine (mg/dL)         | 0.520 ± 0.010 | 0.510 ± 0.049 | 0.480 ± 0.017 |
| Globulin (g/dL)            | 1.70 ± 0.100  | 1.95 ± 0.122  | 1.60 ± 0.200  |
| Glucose (mg/dL)            | 232 ± 5.76    | 208 ± 13.5    | 188 ± 16.0    |
| Potassium (mmol/L)         | 8.71 ± 0.476  | 9.60 ± 0.171  | 8.32 ± 0.597  |
| Sodium (mmol/L)            | 153 ± 6.25    | 158 ± 1.23    | 148 ± 6.56    |
| Phosphorous (mg/dL)        | 6.20 ± 0.872  | 5.55 ± 0.122  | 4.90 ± 0.361  |
| Total bilirubin (mg/dL)    | 0.200 ± 0.010 | 0.315 ± 0.012 | 0.200 ± 0.010 |
| Total protein (g/dL)       | 4.80 ± 0.300  | 5.10 ± 0.000  | 4.50 ± 0.300  |
| Magnesium (mg/dL)          | 2.30 ± 0.265  | 2.28 ± 0.152  | 2.80 ± 0.361  |

*Abbreviations:* ALT, alanine aminotransferase; BUN, blood urea nitrogen.
