# Supplementary material for: Identification of OAT1/OAT3 as Contributors to Cisplatin Toxicity
Source: PubMed Central journal article supplement — Clin Transl Sci. 2017 Jul 8;10(5):412–20. doi: 10.1111/cts.12480 (PMC5593168; doi:10.1111/cts.12480), 2017-07-08
Supplement: CTS-10-412-s002.pdf [file CTS-10-412-s002.pdf]

**Supplementary Table S2.** Genes included on the Mouse Transporter RT<sup>2</sup> Profiles PCR array system.

| Number | Symbol        | Number | Symbol         | Number | Symbol         | Number | Symbol          | Number | Symbol           |
|--------|---------------|--------|----------------|--------|----------------|--------|-----------------|--------|------------------|
| 1      | <i>Abca1</i>  | 21     | <i>Abcc12</i>  | 41     | <i>Slc5a1</i>  | 61     | <i>Slc22a3</i>  | 81     | <i>Slco3a1</i>   |
| 2      | <i>Abca2</i>  | 22     | <i>Abcd1</i>   | 42     | <i>Slc5a4a</i> | 62     | <i>Slc22a6</i>  | 82     | <i>Slco4a1</i>   |
| 3      | <i>Abca3</i>  | 23     | <i>Abcd3</i>   | 43     | <i>Slc7a11</i> | 63     | <i>Slc22a7</i>  | 83     | <i>Slco22a4</i>  |
| 4      | <i>Abca4</i>  | 24     | <i>Abcd4</i>   | 44     | <i>Slc7a4</i>  | 64     | <i>Slc22a8</i>  | 84     | <i>Slco29a3</i>  |
| 5      | <i>Abca9</i>  | 25     | <i>Abcf1</i>   | 45     | <i>Slc7a5</i>  | 65     | <i>Slc22a9</i>  | 85     | <i>Tap1</i>      |
| 6      | <i>Abca12</i> | 26     | <i>Abcg2</i>   | 46     | <i>Slc7a6</i>  | 66     | <i>Slc25a13</i> | 86     | <i>Tap2</i>      |
| 7      | <i>Abca13</i> | 27     | <i>Abcg8</i>   | 47     | <i>Slc7a7</i>  | 67     | <i>Slc28a1</i>  | 87     | <i>Vdac1</i>     |
| 8      | <i>Abcb1a</i> | 28     | <i>Aqp1</i>    | 48     | <i>Slc7a8</i>  | 68     | <i>Slc28a2</i>  | 88     | <i>Vdac2</i>     |
| 9      | <i>Abcb1b</i> | 29     | <i>Aqp7</i>    | 49     | <i>Slc7a9</i>  | 69     | <i>Slc29a1</i>  | 89     | <i>Gusb*</i>     |
| 10     | <i>Abcb4</i>  | 30     | <i>Aqp9</i>    | 50     | <i>Slc10a1</i> | 70     | <i>Slc29a2</i>  | 90     | <i>Hprt1*</i>    |
| 11     | <i>Abcb5</i>  | 31     | <i>Atp6v0c</i> | 51     | <i>Slc10a2</i> | 71     | <i>Slc31a1</i>  | 91     | <i>Hsp90ab1*</i> |
| 12     | <i>Abcb6</i>  | 32     | <i>Atp7a</i>   | 52     | <i>Slc15a1</i> | 72     | <i>Slc38a2</i>  | 92     | <i>Gapdh*</i>    |
| 13     | <i>Abcb11</i> | 33     | <i>Atp7b</i>   | 53     | <i>Slc15a2</i> | 73     | <i>Slc38a5</i>  | 93     | <i>Actb*</i>     |
| 14     | <i>Abcc1</i>  | 34     | <i>Mvp</i>     | 54     | <i>Slc16a1</i> | 74     | <i>Slco1a4</i>  | 94     | <i>MGDC*</i>     |
| 15     | <i>Abcc2</i>  | 35     | <i>Ralbp1</i>  | 55     | <i>Slc16a2</i> | 75     | <i>Slco1a5</i>  | 95     | <i>RTC*</i>      |
| 16     | <i>Abcc3</i>  | 36     | <i>Slc2a1</i>  | 56     | <i>Slc16a3</i> | 76     | <i>Slco1a6</i>  | 96     | <i>PPC*</i>      |
| 17     | <i>Abcc4</i>  | 37     | <i>Slc2a2</i>  | 57     | <i>Slc19a1</i> | 77     | <i>Slco1b2</i>  |        |                  |
| 18     | <i>Abcc5</i>  | 38     | <i>Slc2a3</i>  | 58     | <i>Slc19a2</i> | 78     | <i>Slco1c1</i>  |        |                  |
| 19     | <i>Abcc6</i>  | 39     | <i>Slc3a1</i>  | 59     | <i>Slc22a1</i> | 79     | <i>Slco2a1</i>  |        |                  |
| 20     | <i>Abcc10</i> | 40     | <i>Slc3a2</i>  | 60     | <i>Slc22a2</i> | 80     | <i>Slco2b1</i>  |        |                  |

\* Included as controls/house-keeping genes.
