# Supplementary material for: Identification of OAT1/OAT3 as Contributors to Cisplatin Toxicity
Source: PubMed Central journal article supplement — Clin Transl Sci. 2017 Jul 8;10(5):412–20. doi: 10.1111/cts.12480 (PMC5593168; doi:10.1111/cts.12480), 2017-07-08
Supplement: CTS-10-412-s003.pdf [file CTS-10-412-s003.pdf]

**Supplementary Table S3.** Composition of the Mouse Nephrotoxicity RT<sup>2</sup> Profiler PCR array.\*

**Up-Regulated in Nephrotoxicity**

Apoptosis: [Angptl4](#), [Anxa5](#), [Btg2](#), [Cd24a](#), [Cd44](#), [Cdkn1a](#) (p21Cip1, Waf1), [Clu](#), [Gadd45a](#), [Gstp1](#), [Hmox1](#), [Nqo1](#), [Rtn4](#), [Socs3](#), [Tnfrsf12a](#).

Cell Cycle: [Ccnd1](#), [Ccng1](#), [Cdkn1a](#) (p21Cip1, Waf1), [Gadd45a](#), [Mcm6](#).

Metal Ion Binding: [Bmp1](#), [Ccs](#), [Cp](#), [Ctss](#), [Hmox1](#), [Hmox2](#), [Mt1](#).

Oxidative Stress: [Clu](#), [G6pdx](#), [Gpx8](#), [Hmox1](#), [Hmox2](#), [Nqo1](#).

Cell Proliferation: [Atf3](#), [Btg2](#), [Ccnd1](#), [Cd24a](#), [Cdkn1a](#) (p21Cip1, Waf1), [Clu](#), [Cxcl10](#) (INP10), [Cxcl3](#), [Glul](#), [Gpnmb](#), [Hmox1](#), [Hsp90aa1](#) (Hspca), [Timp1](#), [Uchl1](#), [Vcam1](#).

Tissue Remodeling: [Cst3](#), [Fn1](#), [Havcr1](#) (Kim-1), [Spp1](#), [Timp1](#).

Transporters: [Abcb1a](#) (Mdr1), [Abcc2](#) (Mrp2, cMOAT).

Xenobiotic Metabolism: [Cyp2c54](#), [Gstp1](#), [Ugt1a6a](#).

Extracellular Matrix Molecules: [Angptl4](#), [Ccl3](#) (Mip-1a), [Cd44](#), [Cst3](#), [Fgb](#), [Lgals3](#), [Mgp](#), [Timp1](#).

Cytoskeleton Regulators: [Ccl3](#) (Mip-1a), [G6pdx](#), [Sprr1a](#), [Tmsb10](#), [Vim](#).

Other Genes: [A2m](#), [Gc](#), [Igfbp1](#), [Lcn2](#) (NGAL), [Ugt1a1](#).

**Down-Regulated in Nephrotoxicity**

Apoptosis: [Bmp4](#), [Cat](#), [Ghr](#), [Igfbp3](#), [Sod2](#).

Cell Cycle: [Bmp4](#), [Egf](#).

Metal Ion Binding: [Bhmt](#), [Idh1](#), [Rgn](#), [Scd1](#), [Sod2](#), [Sod3](#).

Oxidative Stress: [Cat](#), [Gatm](#), [Idh1](#), [Sod2](#), [Sod3](#).

Cell Proliferation: [Bmp4](#), [Egf](#), [Igfbp3](#), [Nox4](#), [Odc1](#), [Sod2](#).

Transporters: [Slc22a1](#), [Slc22a5](#), [Slc22a6](#).

Xenobiotic Metabolism: [Cyp2d22](#), [Fmo2](#), [Gstk1](#).

Extracellular Matrix Molecules: [Bmp4](#), [Cyr61](#), [Sod3](#).

Other Genes: [Aass](#), [Aldh1a1](#) (Raldh1), [Calb1](#), [G6pc](#), [Gamt](#), [Ipmk](#), [Klk1](#), [Nphs2](#), [Oat](#).

\*Genes highlighted in yellow represent those genes de-regulated in the kidneys of wild-type mice but not *Oat1*(-/-) mice after the administration of cisplatin.
