# Supplementary material for: Identification of OAT1/OAT3 as Contributors to Cisplatin Toxicity
Source: PubMed Central journal article supplement — Clin Transl Sci. 2017 Jul 8;10(5):412–20. doi: 10.1111/cts.12480 (PMC5593168; doi:10.1111/cts.12480), 2017-07-08
Supplement: CTS-10-412-s004.pdf [file CTS-10-412-s004.pdf]

**Supplementary Table S4.** Influence of nilotinib on the plasma pharmacokinetics of cisplatin in mice.\*

| Parameter                          | Wild-type |             | Oatp1b2(-/-) |             |
|------------------------------------|-----------|-------------|--------------|-------------|
|                                    | + Vehicle | + Nilotinib | + Vehicle    | + Nilotinib |
| <b>Total platinum</b>              |           |             |              |             |
| C <sub>max</sub> (µg/mL)           | 9.21      | 10.8        | 8.49         | 8.63        |
| AUC (µg·h/mL)                      | 9.98      | 11.6        | 10.3         | 11.8        |
|                                    |           |             |              |             |
| <b>Unbound platinum</b>            |           |             |              |             |
| C <sub>max</sub> (µg/mL)           | 6.06      | 5.51        | 3.81         | 4.78        |
| AUC (µg·h/mL)                      | 2.07      | 2.36        | 1.62         | 2.29        |
| AUC <sub>u</sub> /AUC <sub>t</sub> | 0.208     | 0.203       | 0.158        | 0.195       |
| CL (L/h/kg)                        | 7.11      | 6.26        | 8.79         | 6.31        |
| T <sub>1/2</sub> (h)               | 0.63      | 0.59        | 1.57         | 1.27        |

*Abbreviations:* C<sub>max</sub>, peak plasma concentration; AUC, area under the plasma concentration-time curve; AUC<sub>u</sub>/AUC<sub>t</sub>, fraction unbound drug; CL, clearance; T<sub>1/2</sub>, terminal half-life.

\*Parameters are presented were derived from concentrations determined in plasma obtained at various time points after administration of a single dose of cisplatin (15 mg/kg) with or without pretreatment with nilotinib (150 mg/kg; p.o.) in DBA/lacJ (wild-type) mice or age-matched Oatp1b2(-/-) mice. The AUC was calculated using non-compartmental pharmacokinetic analysis extrapolated out to 4 hours. The unbound platinum concentration was determined following ethanolic plasma-protein precipitation, as described (86). Parameters were calculated using the software package PK Solutions 2.0 (Summit Research Services).
