# Supplementary material for: Identification of OAT1/OAT3 as Contributors to Cisplatin Toxicity
Source: PubMed Central journal article supplement — Clin Transl Sci. 2017 Jul 8;10(5):412–20. doi: 10.1111/cts.12480 (PMC5593168; doi:10.1111/cts.12480), 2017-07-08
Supplement: CTS-10-412-s005.pdf [file CTS-10-412-s005.pdf]

## Supplementary Figure S1

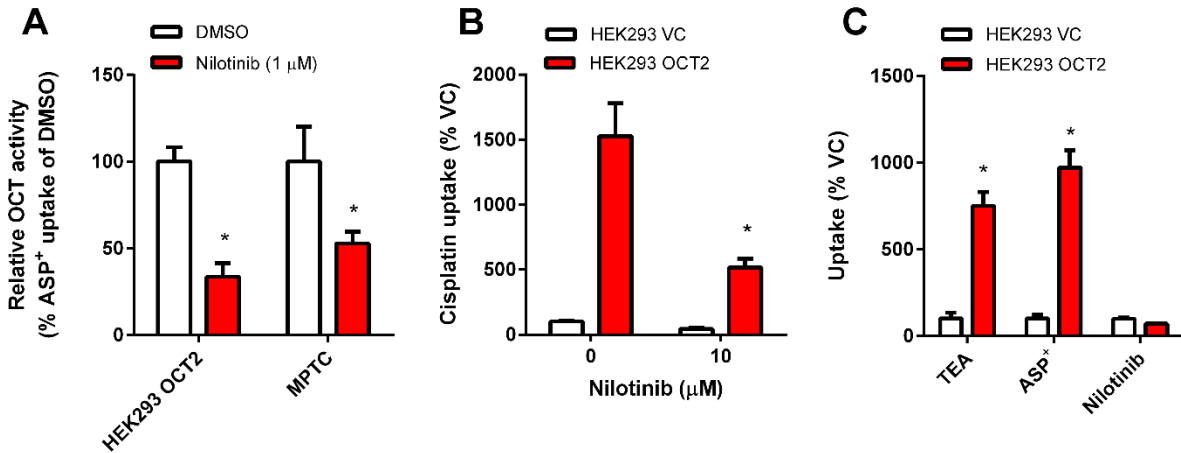

**Inhibition of OCT2 function by nilotinib.** Inhibition of OCT2 function (**A**) in transfected HEK293 cells *in vitro*, and of mOct1/mOct2 function in mouse proximal tubules (MPTC) from FVB (wild-type mice) *ex vivo* by nilotinib (1  $\mu$ M; 15-min pre-incubation), as evaluated using 4-4-dimethylaminostyryl-N-methylpyridinium (ASP<sup>+</sup>) as a prototypical substrate of OCT2. Proximal tubules (S2 and S3 segments) were mechanically isolated as described (85). Data (n = 6-49 per group) were normalized to substrate uptake in the absence of nilotinib and corrected for non-specific transport in cells transfected with an empty vector (VC). (**B**) Uptake of cisplatin (500  $\mu$ M; 30-min uptake) by OCT2 in transfected HEK293 cells, with or without pre-incubation with nilotinib (10  $\mu$ M; 15-min pre-incubation). Data (n = 9 per group) were normalized to cisplatin uptake in cells transfected with an empty vector (VC). (**C**) Uptake of tetraethyl-ammonium (TEA), ASP<sup>+</sup> (2  $\mu$ M each; 15-min uptake), or nilotinib (1  $\mu$ M; 15-min uptake) by HEK293 cells overexpressing OCT2. Data (n = 6 per group) were normalized to substrate uptake in cells transfected with an empty vector (VC). All data represent mean values (bars or symbols) and SD (error bars), and the star (\*) represents  $P < 0.05$  versus the respective control group.
