# Supplementary material for: Identification of OAT1/OAT3 as Contributors to Cisplatin Toxicity
Source: PubMed Central journal article supplement — Clin Transl Sci. 2017 Jul 8;10(5):412–20. doi: 10.1111/cts.12480 (PMC5593168; doi:10.1111/cts.12480), 2017-07-08
Supplement: CTS-10-412-s006.pdf [file CTS-10-412-s006.pdf]

## Supplementary Figure S2

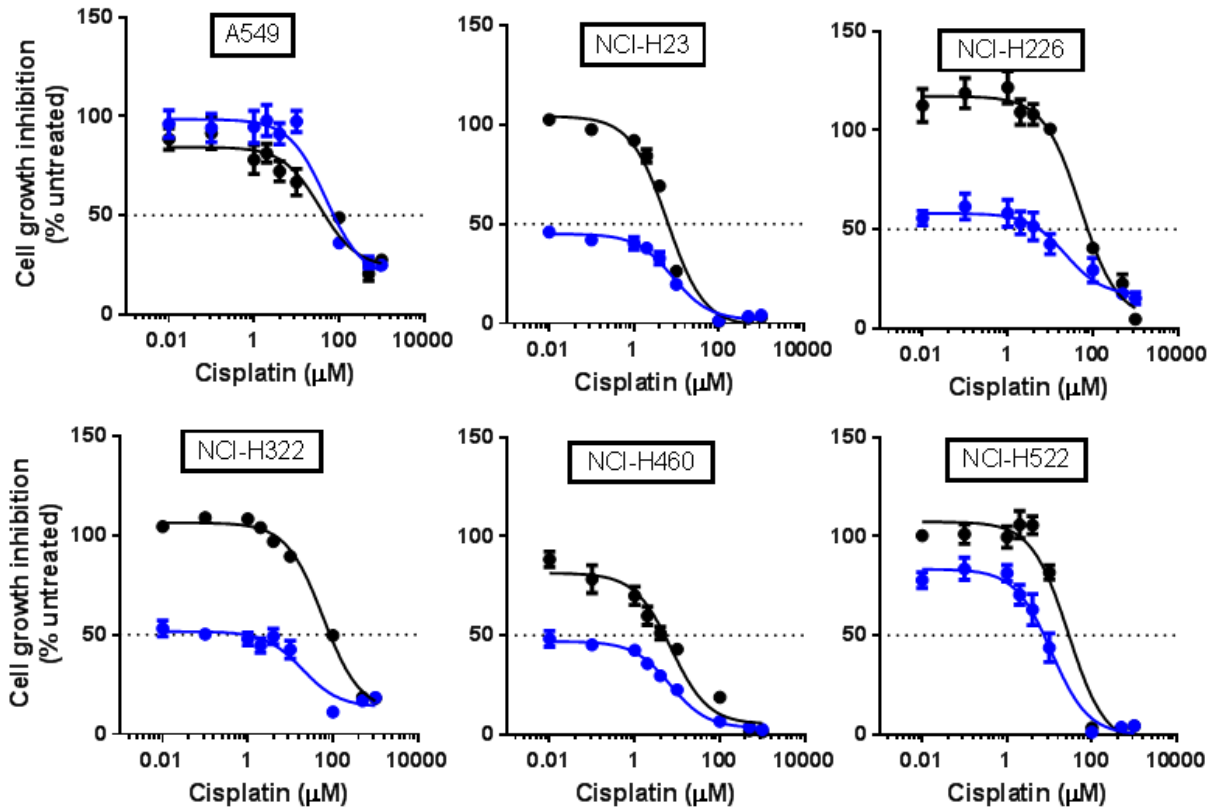

**Cytotoxicity of nilotinib-cisplatin in lung cancer models.** Influence of nilotinib (10  $\mu\text{M}$ ; 15-min pre-incubation) on the cytotoxicity of cisplatin in the replicating NSCLC cell lines A549, H23, H226, H322, H460, and H522. Data ( $n = 16$  per group) represent mean (bars) and SD (error bars). Black symbols and lines represent results for cisplatin alone, and blue symbols and lines represent results for the combination of nilotinib and cisplatin. OAT1 (<http://www.proteinatlas.org/ENSG00000149452-SLC22A6/cell>) and OAT3 (<http://www.proteinatlas.org/ENSG00000149452-SLC22A8/cell>) are not expressed in these lung cancer cells lines.
