# Supplementary material for: Identification of OAT1/OAT3 as Contributors to Cisplatin Toxicity
Source: PubMed Central journal article supplement — Clin Transl Sci. 2017 Jul 8;10(5):412–20. doi: 10.1111/cts.12480 (PMC5593168; doi:10.1111/cts.12480), 2017-07-08
Supplement: CTS-10-412-s007.pdf [file CTS-10-412-s007.pdf]

Supplementary Figure S3

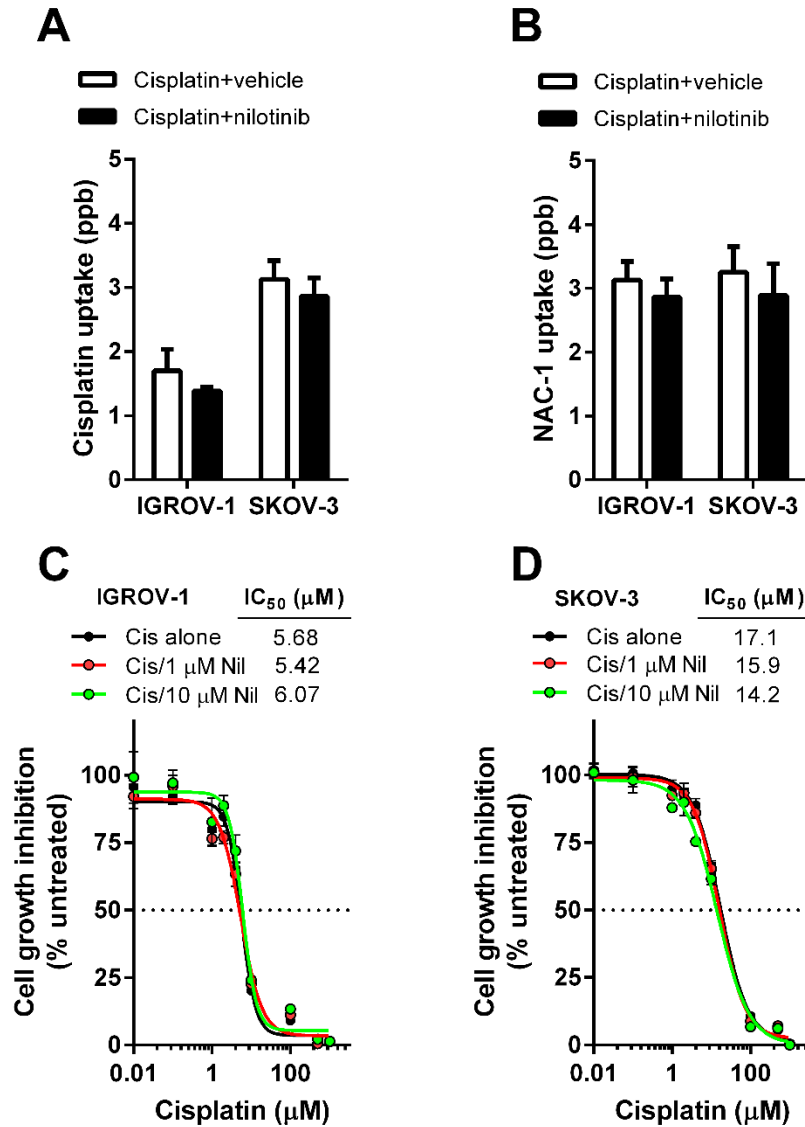

**Cytotoxicity of nilotinib-cisplatin in ovarian cancer models.** Influence of nilotinib (Nil; 1 or 10 μM; 15-min pre-incubation) on the uptake of cisplatin (Cis) (**A**) and NAC-1 (**B**), drug-induced cytotoxicity (**C**, **D**) in the replicating ovarian cancer cell lines IGROV-1 and SKOV-3. Data (n = 4-8 per group) represent mean (bars) and SD (error bars).
